# Supplementary material
Source: PubMed Central journal article supplement (PMC3683713)
Supplement: 1221721110_pnas.201221721SI.pdf [file 1221721110_pnas.201221721SI.pdf]

# Supporting Information

Bernhard et al. 10.1073/pnas.1221721110

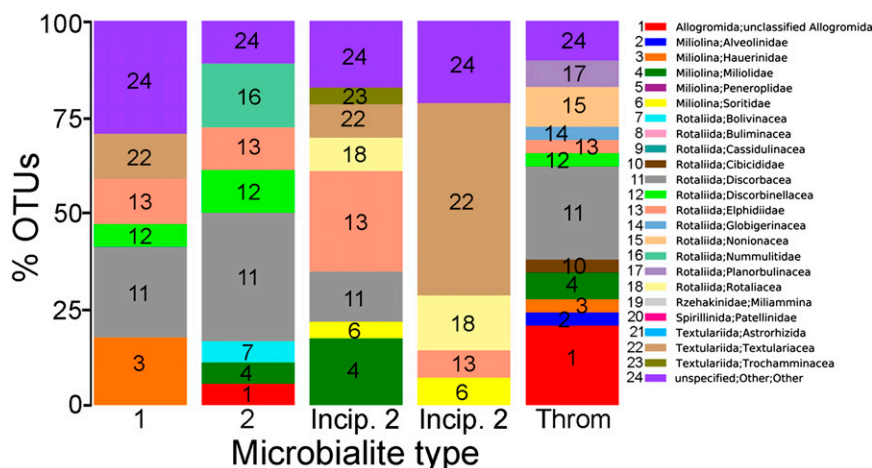

**Fig. S1.** Stacked bar graph showing taxonomic diversity of foraminifera, presented as percent operational taxonomic units (OTUs) for each taxonomic unit, in the 0- to 1-cm fraction of different Highborne microbialite types (1, stromatolitic type 1; 2, stromatolitic type 2; Incip. 2, incipient type 2 stromatolitic mat; throm, thrombolite). Unweighted diversity of operational taxonomic units (at 97% sequence similarity) revealed by Sanger clone libraries and foraminifera-specific primers.

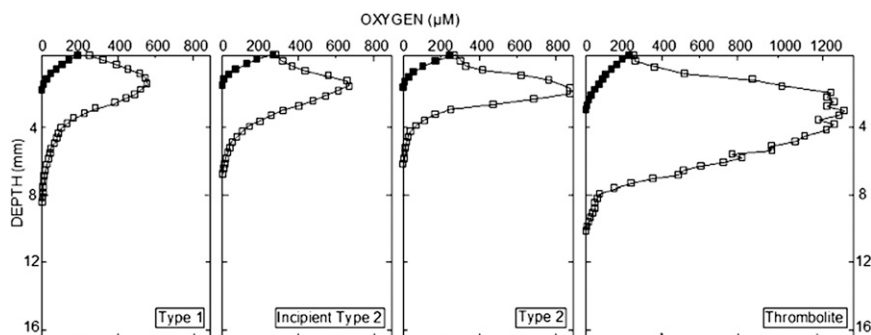

**Fig. S2.** Depth profiles of the oxygen concentrations in the four microbialite types studied for this investigation. Daytime readings (open symbols) were taken during peak photosynthesis (between 12:00 PM and 2:00 PM; light intensity ranged from 1,988 to 2,104  $\mu\text{E}\cdot\text{m}^{-2}\cdot\text{s}^{-1}$ ). Nighttime observations (closed symbols) were made at the end of the dark period (4:00–6:00 AM; light intensity was 0–0.01  $\mu\text{E}\cdot\text{m}^{-2}\cdot\text{s}^{-1}$ ). From left to right are a type 1 stromatolitic mat, incipient type 2 stromatolitic mat, type 2 stromatolitic mat, and thrombolite mat.

**Table S1. Species or taxon occurrences presented for the different microbialite samples, along with group-specific proportions and total densities**

| Sample                             | Stromatolite |            |                  |                  |            |            | Thrombolite | Thrombolite |
|------------------------------------|--------------|------------|------------------|------------------|------------|------------|-------------|-------------|
|                                    | Type 1       | Type 1     | Incipient type 2 | Incipient type 2 | Type 2     | Type 2     |             |             |
| Sediment interval, cm              | 0–0.5        | 0–0.5      | 0–1              | 0–0.5            | 0–2        | 0–1.5      | 0–1.5       |             |
| <b>Thecate</b>                     |              |            |                  |                  |            |            |             |             |
| Allogromiids                       | —            | 2          | —                | 3                | 1          | 9          | 2           |             |
| Multilocular thecate               | —            | —          | 1                | 2                | —          | 5          | 39          |             |
| <b>Agglutinated</b>                |              |            |                  |                  |            |            |             |             |
| <i>Eggerella</i> sp.               | —            | —          | —                | —                | —          | —          | 13          |             |
| <i>Psammosphaera</i> sp.           | —            | —          | —                | 1                | 1          | 11         | 2           |             |
| <i>Saccamina</i> sp.               | —            | —          | —                | —                | —          | —          | 5           |             |
| <i>Valvulina cf. oviedoiana</i>    | —            | —          | —                | —                | —          | 14         | 19          |             |
| <b>Calcareous</b>                  |              |            |                  |                  |            |            |             |             |
| <i>Archais?</i> sp.                | —            | —          | —                | —                | —          | 1          | 3           |             |
| <i>Bolivina</i> sp.                | —            | —          | —                | —                | —          | 2          | —           |             |
| <i>Bulimina elongata</i>           | —            | —          | —                | —                | —          | 1          | 1           |             |
| <i>Cymbaloporetta</i> sp.          | 2            | —          | —                | —                | —          | 2          | 3           |             |
| <i>Dendritina?</i> sp.             | 1            | 3          | —                | —                | —          | 1          | —           |             |
| <i>Discorbis rosea</i>             | 2            | 5          | —                | 2                | —          | 1          | —           |             |
| <i>Discorbis</i> sp.               | —            | 23         | —                | 1                | —          | —          | —           |             |
| <i>Elphidium</i> sp.               | —            | 1          | —                | —                | —          | 1          | —           |             |
| <i>Miliolinella</i> sp. 1          | —            | —          | —                | 4                | —          | 16         | 11          |             |
| <i>Miliolinella</i> sp. 2          | —            | —          | —                | —                | —          | 1          | —           |             |
| <i>Neoconorbina cf. terquemi</i>   | —            | 2          | —                | —                | —          | 2          | —           |             |
| <i>Planorbulina acervalis</i>      | 1            | 4          | —                | 3                | —          | 15         | 2           |             |
| <i>Pyrgo</i> sp.                   | —            | —          | —                | —                | —          | —          | 1           |             |
| <i>Quinqueloculina cf. striata</i> | —            | —          | —                | —                | —          | 1          | 8           |             |
| <i>Quinqueloculina</i> sp.         | —            | —          | —                | —                | 2          | 31         | 59          |             |
| <i>Rosalina cf. floridana</i>      | 94           | 72         | 28               | 67               | 103        | 113        | 112         |             |
| <i>Spiroloculina</i> sp.           | —            | —          | —                | 1                | —          | —          | —           |             |
| <i>Strebloides cf. advenus</i>     | 1            | —          | —                | —                | —          | —          | —           |             |
| <i>Uvigerina</i> sp.               | —            | —          | —                | —                | —          | 1          | —           |             |
| Unidentified calcareous            | 2            | 1          | —                | 1                | —          | —          | —           |             |
| <b>Total</b>                       | <b>103</b>   | <b>113</b> | <b>29</b>        | <b>85</b>        | <b>107</b> | <b>228</b> | <b>280</b>  |             |
| Total per cm <sup>3</sup> in situ  | 38.8         | 42.6       | 5.5              | 32.0             | 10.1       | 28.6       | 35.2        |             |
| Calcareous, %                      | 100.0        | 98.2       | 96.6             | 92.9             | 98.1       | 82.9       | 71.4        |             |
| Agglutinated, %                    | 0.0          | 0.0        | 0.0              | 1.2              | 0.9        | 11.0       | 13.9        |             |
| Thecate, %                         | 0.0          | 1.8        | 3.4              | 5.9              | 0.9        | 6.1        | 14.6        |             |
